# Supplementary material for: A computational approach on the stereoselective binding of peptides from aqueous medium with endo-functionalized molecular tubes
Source: Royal Society of Chemistry journal article supplement (doi:10.1039/d1cp02288a), 2021-01-01
Supplement: d1cp02288a1.pdf [file d1cp02288a1.pdf]

## Supporting Information

# A Computational Approach on the Stereoselective Binding of Peptides from Aqueous Medium with Endo-Functionalized Molecular Tubes

Rabindranath Paul, Aritra Mitra, and Sandip Paul\*

*Department of Chemistry, Indian Institute of Technology, Guwahati, Assam 781039, India*

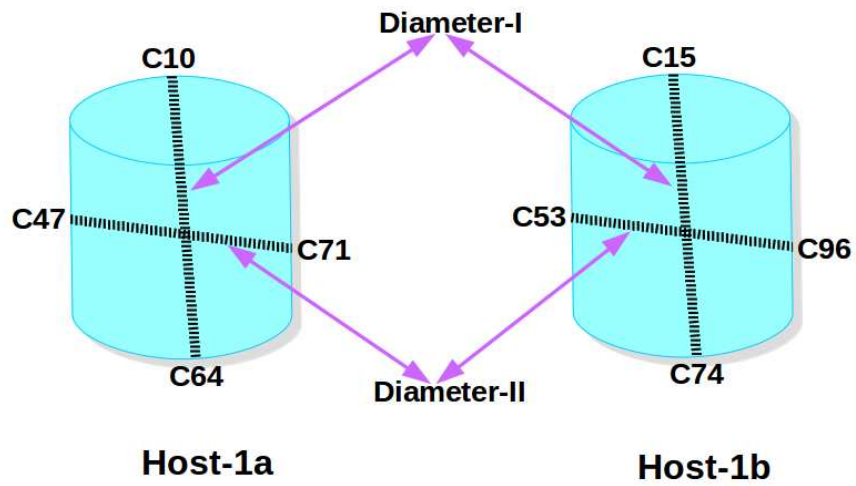

FIG. S1: Schematic representation of the two internal diameters of host-1a and host-1b are displayed as diameter-I and diameter-II.

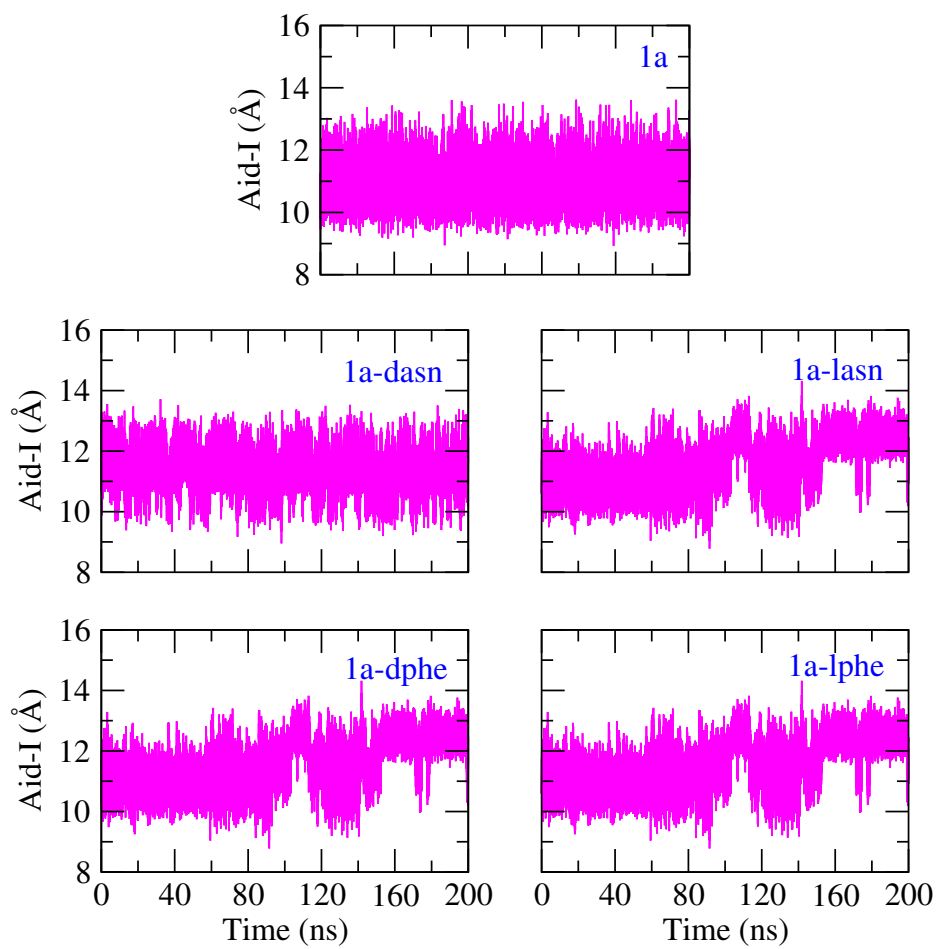

FIG. S2: Diameter-I (Aid-I) of host-1a as a function of simulation time of all the host-1a containing systems.

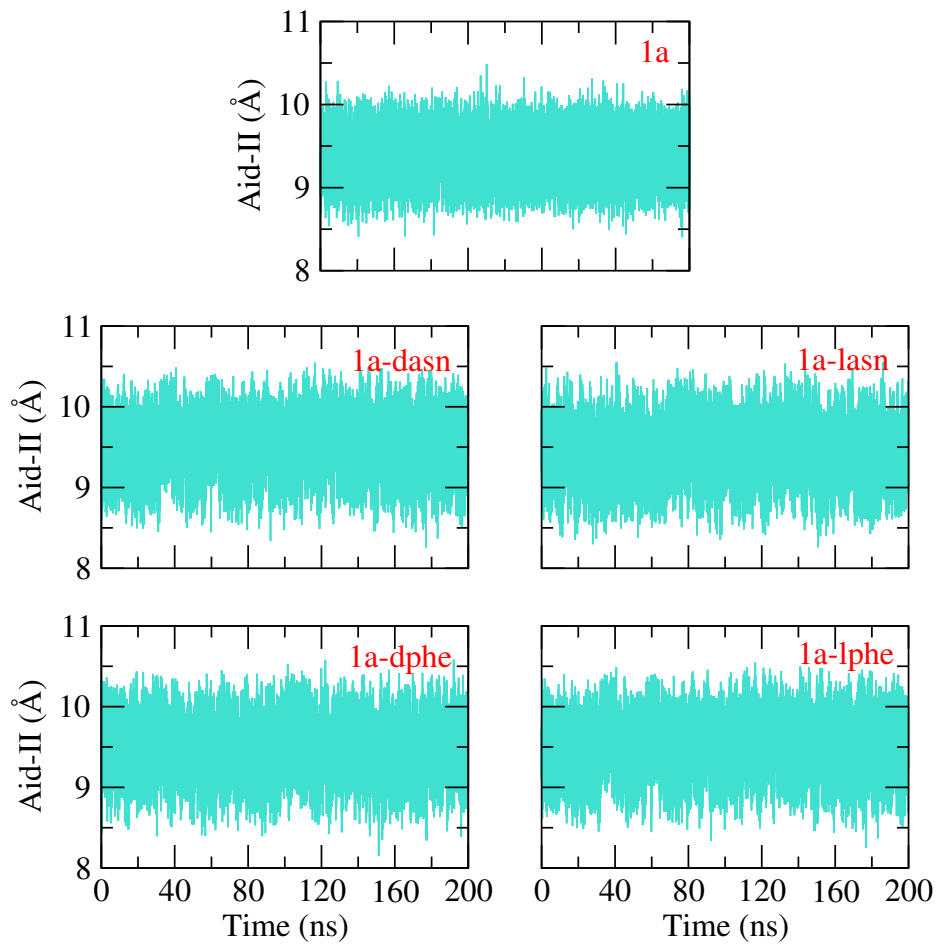

FIG. S3: Diameter-II (Aid-II) of host-1a as a function of simulation time of all the host-1a containing systems.

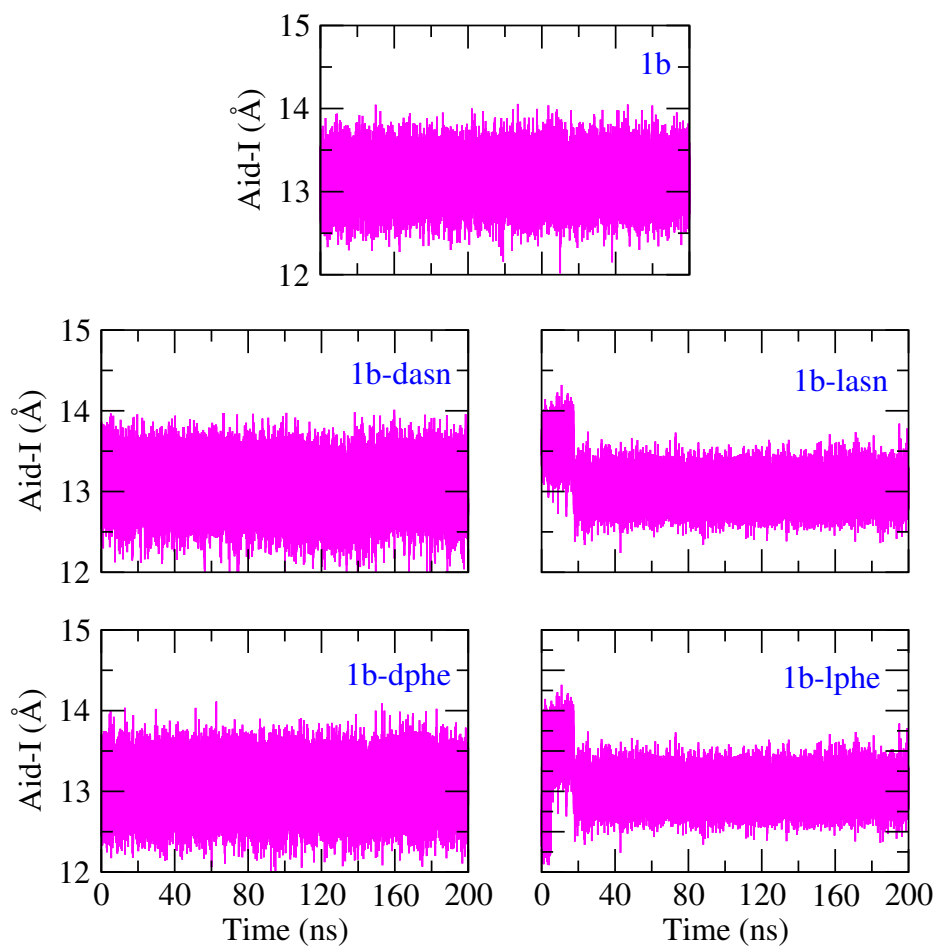

FIG. S4: Diameter-I (Aid-I) of host-1b as a function of simulation time of all the host-1b containing systems.

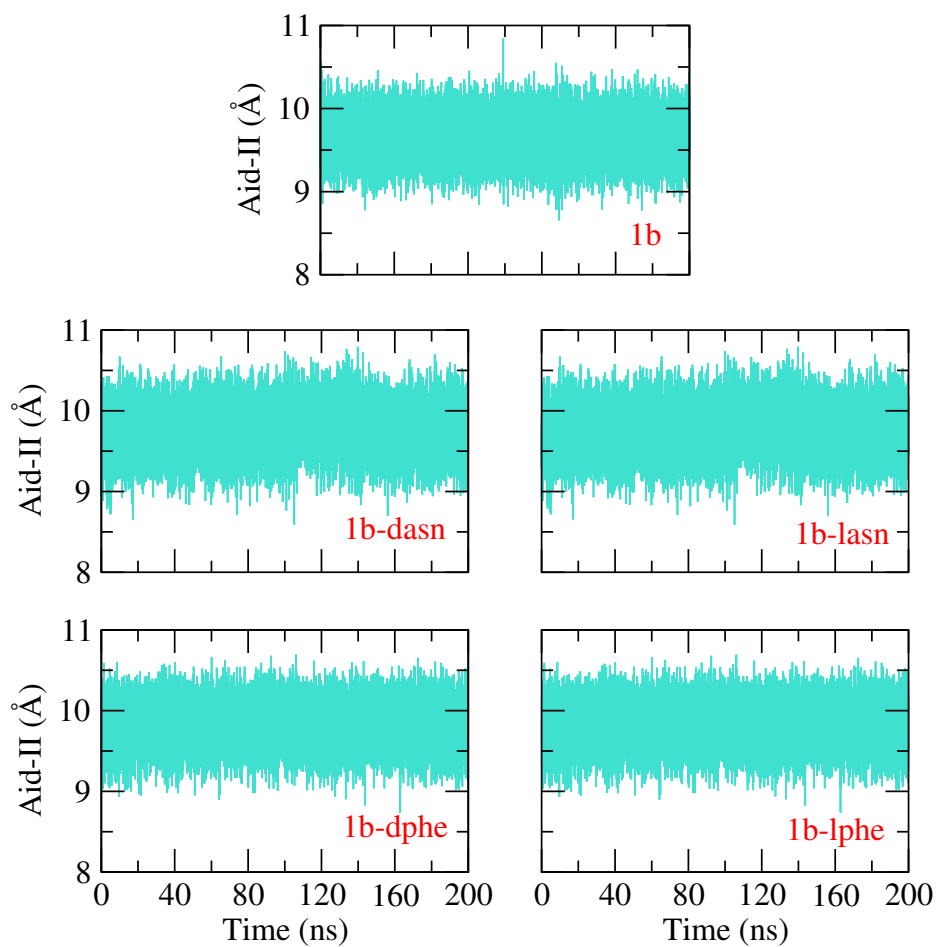

FIG. S5: Diameter-II (Aid-II) of host-1b as a function of simulation time of all the host-1b containing systems.

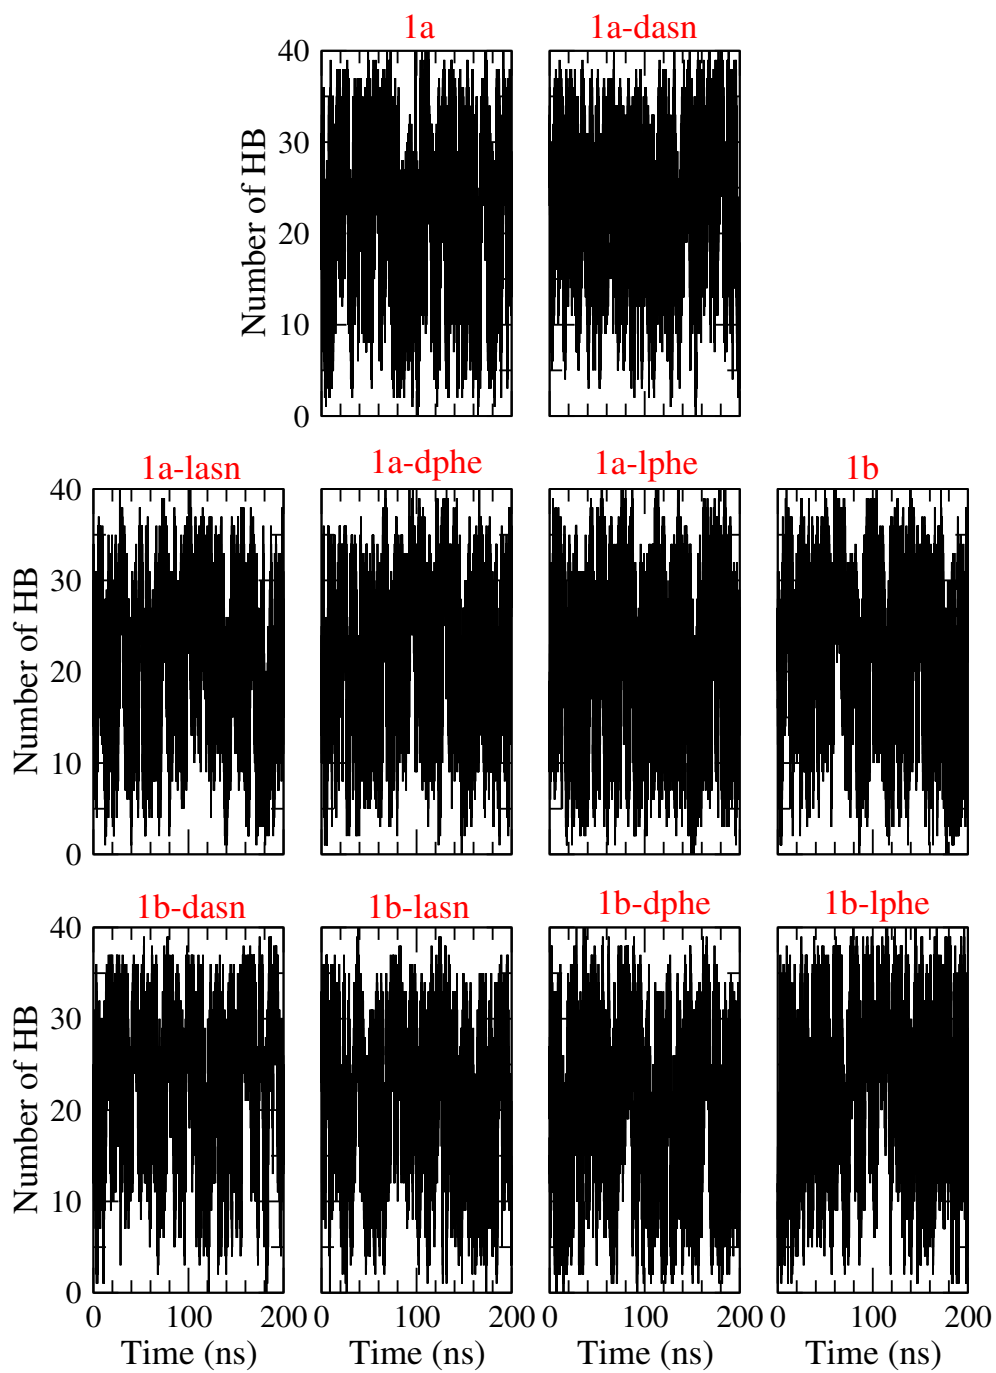

FIG. S6: Time series of the host-water hydrogen bonds of all the systems.

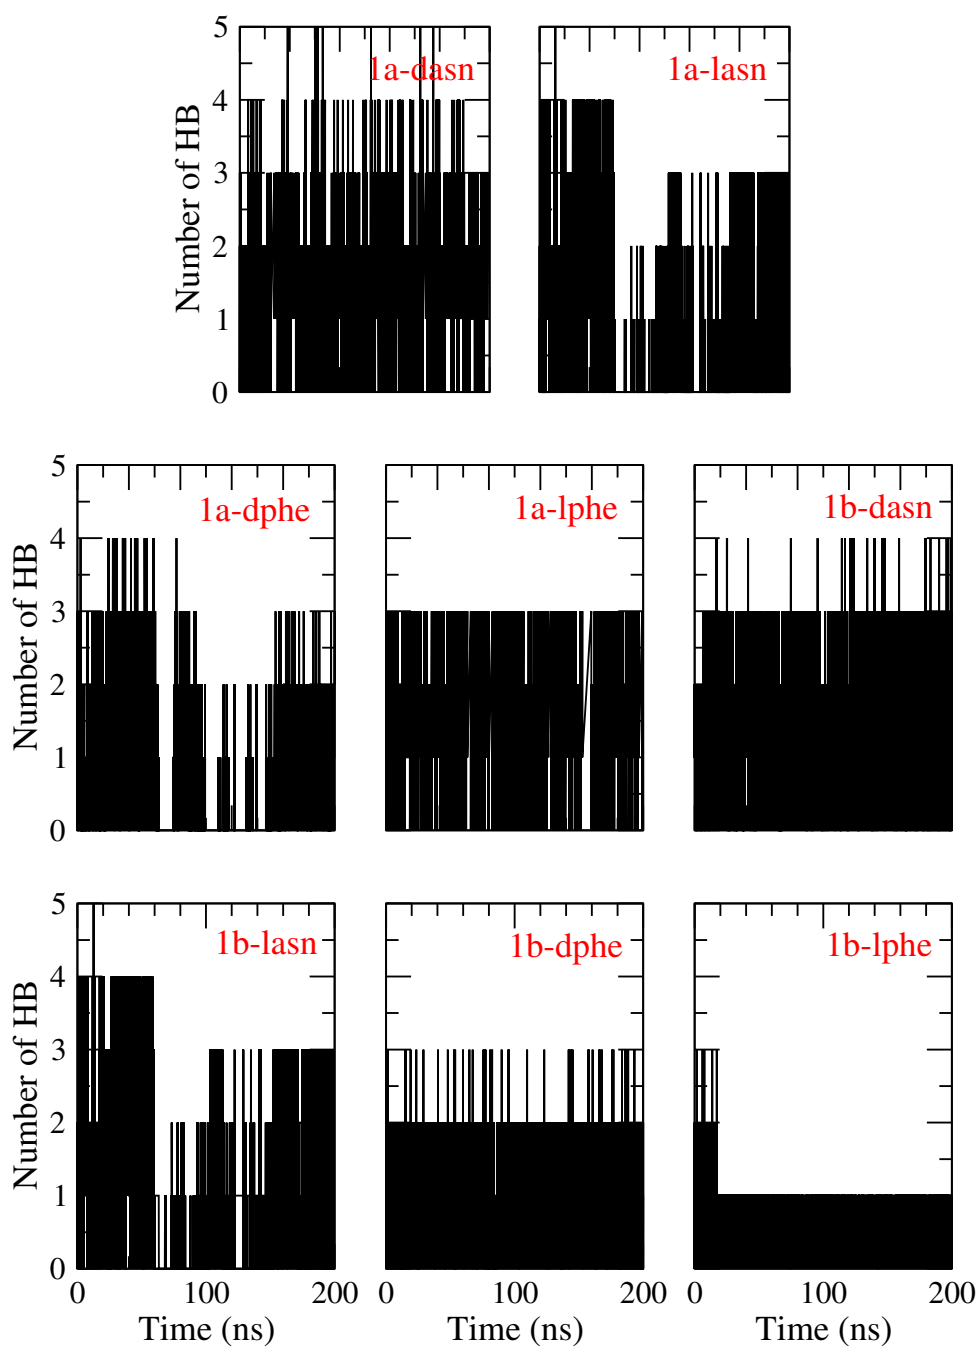

FIG. S7: Time series of the host-peptide hydrogen bonds of all the peptide containing systems.



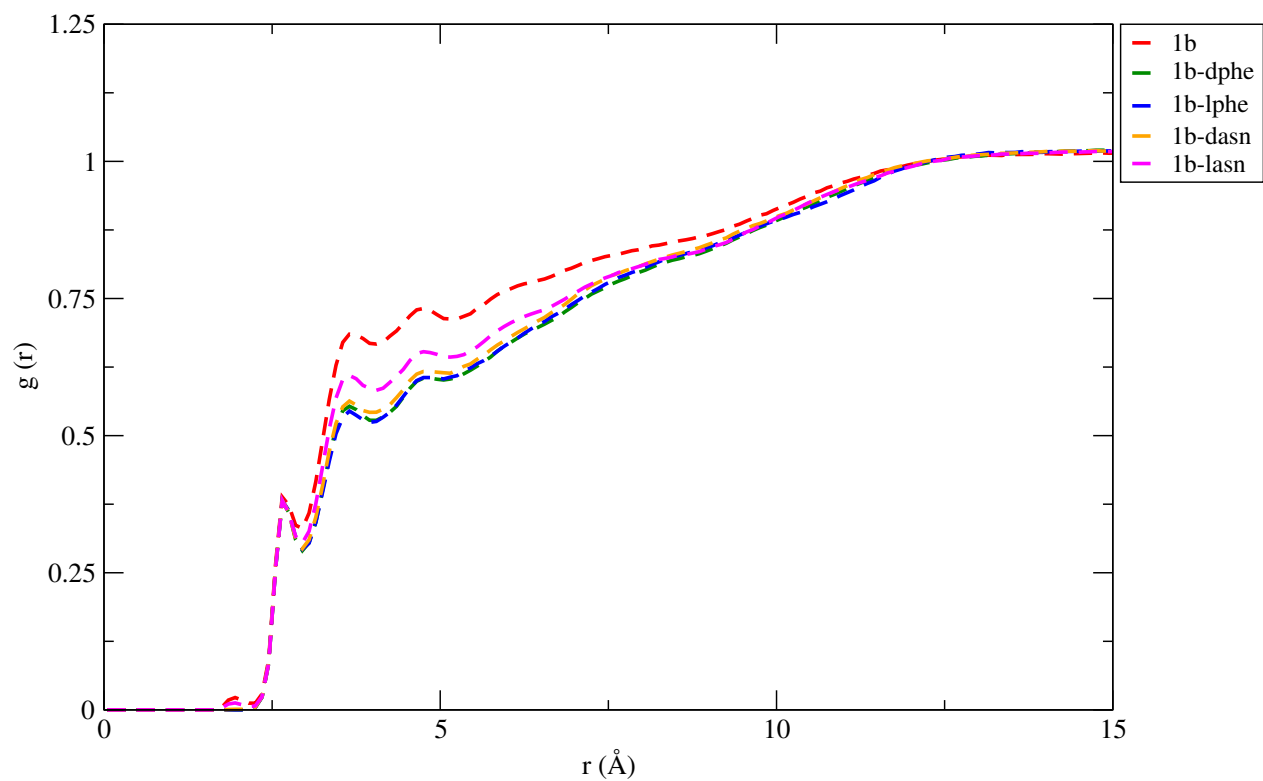

FIG. S8: Radial distribution function of water molecules with the surface of the host-1b for the systems 1b, 1b-dasn, 1b-lasn, 1b-dphe and 1b-lphe are represented here.

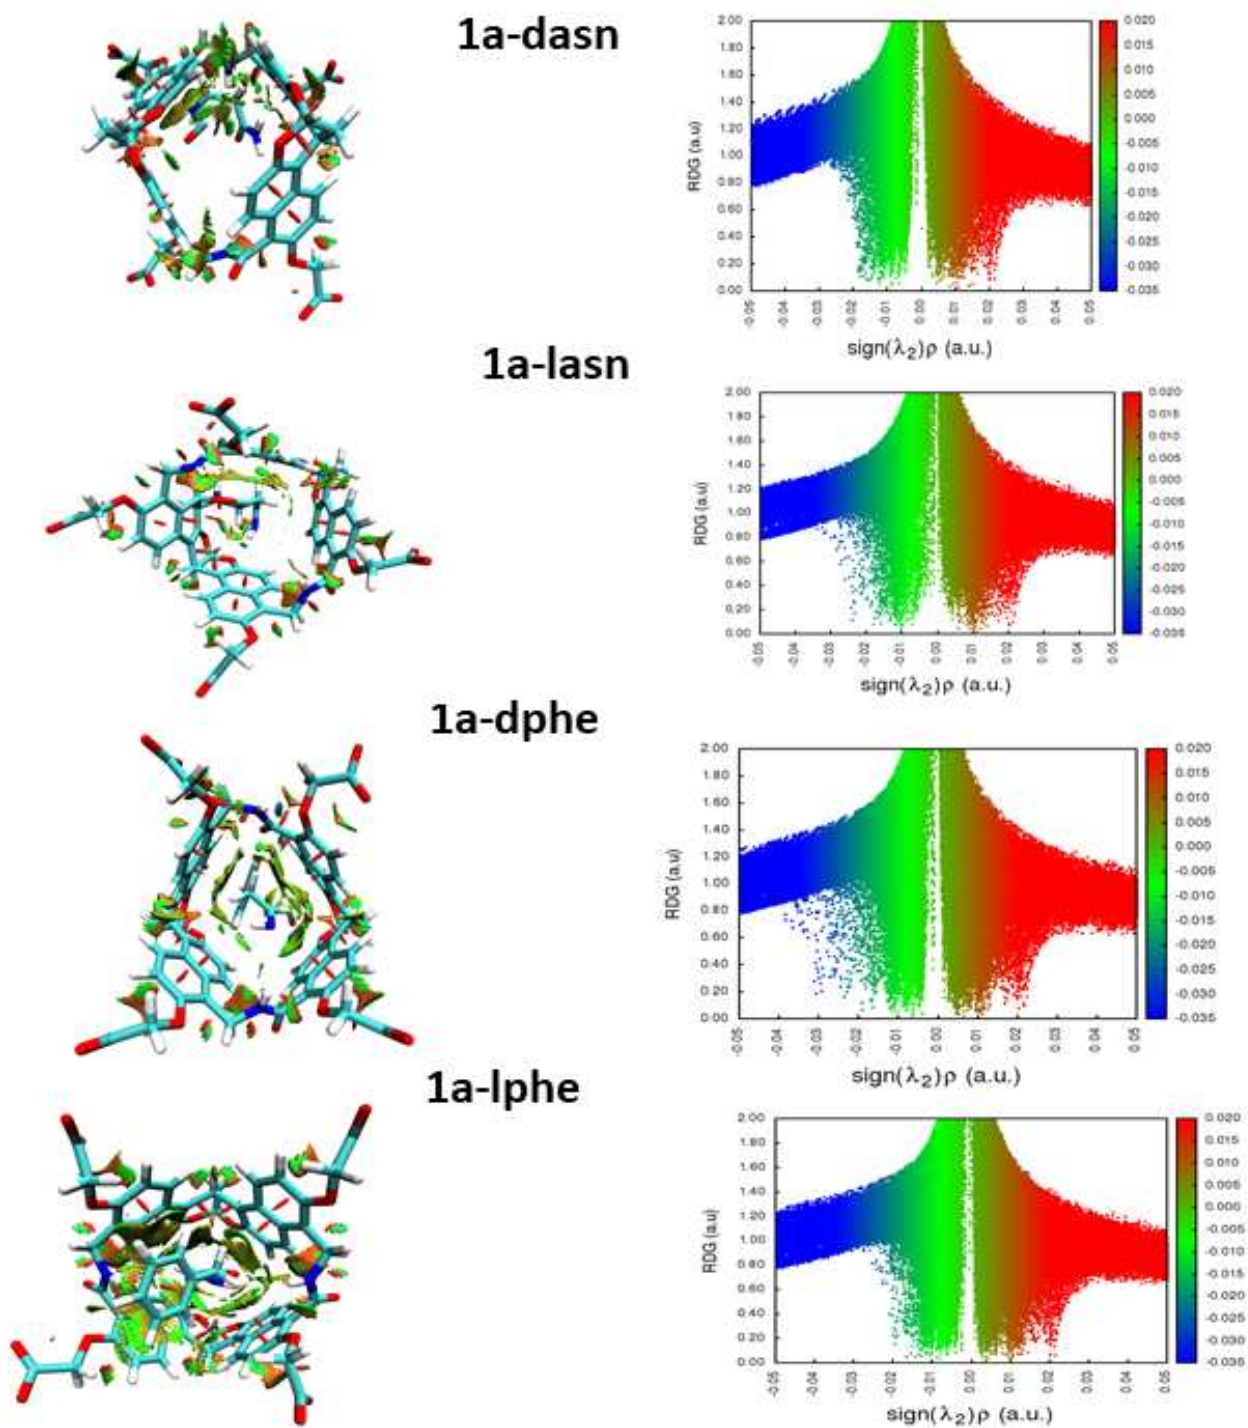

FIG. S9: Color-filled RDG isosurfaces delimitate non-covalent interaction (NCI) regions in 1a-dasn, 1a-lasn, 1a-dphe and 1a-lphe systems.

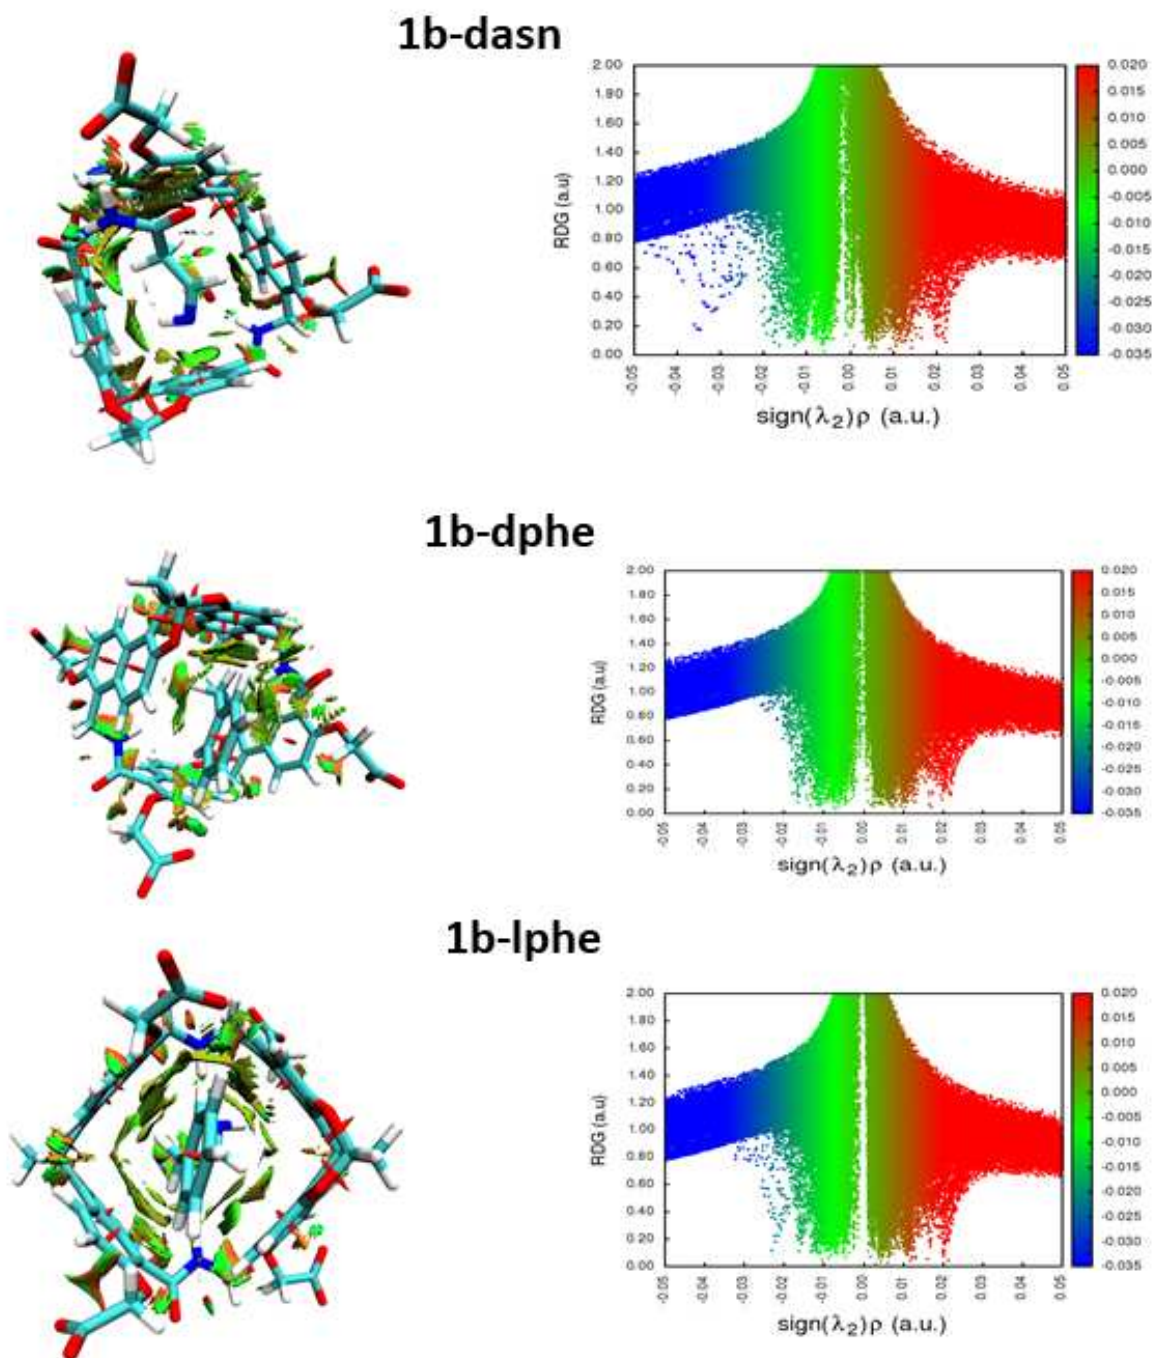

FIG. S10: Color-filled RDG isosurfaces delimitate non-covalent interaction (NCI) regions in 1b-dasn, 1b-dphe and 1b-lphe systems.

TABLE S1: Specifics of all the systems for normal MD simulation.  $N_{\text{host}}$ ,  $N_{\text{NH}_4^+}$ ,  $N_{\text{pep}}$ , and  $N_{\text{wat}}$  represent the numbers of the host molecules, ammonium ions, peptide, and water molecules, respectively.  $M_{\text{host}}$  designates the concentration of the host molecules expressed in molarity. 1a and 1b are the host-1a and host-1b, respectively. 1a-dasn, 1b-lphe, etc., are the systems having dasn, lphe, etc., as the model peptides and the receptors are host-1a and host-1b respectively. Systems 1a and 1b are pure host-water systems without any peptide molecule.

| System      | $N_{\text{host}}$ | $N_{\text{NH}_4^+}$ | $N_{\text{pep}}$ | $N_{\text{wat}}$ | Box volume (nm <sup>3</sup> ) | $M_{\text{host}}$ (M) |
|-------------|-------------------|---------------------|------------------|------------------|-------------------------------|-----------------------|
| 1a          | 1                 | 4                   | 0                | 2280             | 70.58                         | 0.0235                |
| 1a-dasn     | 1                 | 4                   | 1                | 2278             | 70.47                         | 0.0236                |
| 1a-lasn     | 1                 | 4                   | 1                | 2279             | 70.48                         | 0.0236                |
| 1a-dphe     | 1                 | 4                   | 1                | 2279             | 70.65                         | 0.0235                |
| 1a-lphe     | 1                 | 4                   | 1                | 2279             | 70.77                         | 0.0235                |
| 1b          | 1                 | 4                   | 0                | 2321             | 71.43                         | 0.0232                |
| 1b-dasn     | 1                 | 4                   | 1                | 2320             | 71.69                         | 0.0231                |
| 1b-lasn     | 1                 | 4                   | 1                | 2318             | 72.00                         | 0.0230                |
| 1b-dphe     | 1                 | 4                   | 1                | 2319             | 71.72                         | 0.0231                |
| 1b-lphe     | 1                 | 4                   | 1                | 2319             | 71.98                         | 0.0230                |
| 1a-dasn-ran | 1                 | 4                   | 1                | 5535             | 169.13                        | 0.0098                |
| 1a-lphe-ran | 1                 | 4                   | 1                | 5832             | 178.34                        | 0.0093                |
| 1b-lasn-ran | 1                 | 4                   | 1                | 5543             | 169.77                        | 0.0098                |
| 1b-dphe-ran | 1                 | 4                   | 1                | 5833             | 178.15                        | 0.0093                |

TABLE S2: The water-water hydrogen bond distribution and the average number of hydrogen bonds per water molecule,  $\langle n_{HB} \rangle$ , within 5.0 Å from the surface for all the systems are presented here. The data for bulk is included for comparison.

| System  | $f_0$ | $f_1$ | $f_2$ | $f_3$ | $f_4$ | $f_5$ | $f_6$ | $\langle n_{HB} \rangle$ |
|---------|-------|-------|-------|-------|-------|-------|-------|--------------------------|
| bulk    | 0.002 | 0.033 | 0.175 | 0.394 | 0.353 | 0.042 | 0.001 | 3.19                     |
| 1b      | 0.006 | 0.069 | 0.253 | 0.391 | 0.253 | 0.027 | 0.000 | 2.89                     |
| 1b-dasn | 0.006 | 0.067 | 0.247 | 0.395 | 0.256 | 0.028 | 0.000 | 2.91                     |
| 1b-lasn | 0.006 | 0.070 | 0.254 | 0.391 | 0.252 | 0.027 | 0.000 | 2.90                     |
| 1b-dphe | 0.005 | 0.065 | 0.246 | 0.396 | 0.260 | 0.028 | 0.000 | 2.93                     |
| 1b-lphe | 0.005 | 0.067 | 0.250 | 0.393 | 0.257 | 0.027 | 0.000 | 2.91                     |

TABLE S3: The amplitudes  $a_i$ 's and the time constants  $\tau_i$ 's for the tri-exponential fit of the water-water intermittent hydrogen bond time correlation functions are represented here.

| System  | $a_1$ | $\tau_1$ (ps) | $a_2$ | $\tau_2$ (ps) | $a_3$ | $\tau_3$ (ps) |
|---------|-------|---------------|-------|---------------|-------|---------------|
| bulk    | 0.09  | 15.36         | 0.55  | 2.40          | 0.36  | 0.28          |
| 1b      | 0.09  | 23.42         | 0.43  | 3.64          | 0.48  | 0.38          |
| 1b-dasn | 0.10  | 16.54         | 0.42  | 3.75          | 0.48  | 0.39          |
| 1b-lasn | 0.04  | 42.30         | 0.42  | 4.55          | 0.51  | 0.43          |
| 1b-dphe | 0.13  | 13.83         | 0.43  | 3.26          | 0.44  | 0.32          |
| 1b-lphe | 0.12  | 13.24         | 0.43  | 3.08          | 0.44  | 0.32          |

\* Electronic address: [sandipp@iitg.ac.in](mailto:sandipp@iitg.ac.in)
